# Supplementary material for: Rock glaciers in the Daxue Shan, southeastern Tibetan Plateau: aninventory, their distribution, and their environmental controls
Source: Copernicus journal article supplement (doi:10.5194/tc-2017-290), 2018-01-23
Supplement: Supplementary file 1 [file Supplementary data B___Daxue Shan rock glaciers parameters.xlsx]

## Sheet: Sheet1
Number	Rock glaciers location and topography parameters									Contribution area parameters			Category
	Latitude(°)	Longitude(°)	Altitude(m)	Length (m)	Width (m)	Area(m2)	MAF(m)	Slope(°)	Aspect	Length (m)	Altitude difference(m)	Upper limit elevation(m)
ZDSRG-001	30.0402	101.912	4127	981.53	138.805	136242	3971	30.6	36.53				moraine-type，tongue-shaped
ZDSRG-002	30.0362	101.903	4287	592.08	152.233	90133.9	4275	29.7	45.6				moraine-type，tongue-shaped
ZDSRG-003	30.0374	101.901	4316	502.16	134.522	67551.3	4291	23.6	81.08				moraine-type，tongue-shaped
ZDSRG-004	30.04	101.9	4360	1001.2	202.765	203008	4253	25.4	81.44				moraine-type，tongue-shaped
ZDSRG-005	30.0428	101.893	4435	522.32	229.635	119943	4390	27.5	34.32				moraine-type，tongue-shaped
ZDSRG-006	30.0438	101.901	4298	1170.73	316.802	370889	4066	28.6	69.96				moraine-type，tongue-shaped
ZDSRG-007	30.0462	101.886	4519	558.85	161.182	90076.6	4466	28.2	97.67				moraine-type，tongue-shaped
ZDSRG-008	30.0485	101.885	4554	476.35	142.718	67983.9	4507	25.6	79.69				moraine-type，tongue-shaped
ZDSRG-009	30.0584	101.902	4206	2044.52	251.82	514850	3863	29.4	38.23				moraine-type，tongue-shaped
ZDSRG-010	30.0522	101.891	4431	549.12	332.808	182752	4384	26.3	344.63				moraine-type，tongue-shaped
ZDSRG-011	30.057	101.882	4524	372.94	189.13	70534.3	4475	35.3	71.68				moraine-type，tongue-shaped
ZDSRG-012	30.0591	101.883	4492	441.48	126.396	55801.1	4450	28.7	108.84				moraine-type，tongue-shaped
ZDSRG-013	30.062	101.883	4513	595.49	249.685	148685	4469	26.1	116.4				moraine-type，tongue-shaped
ZDSRG-014	30.0619	101.889	4453	130.55	332.538	43412.9	4409	16.5	86.85	488.51	27	4480	talus-type，lobate-shaped
ZDSRG-015	30.0655	101.893	4273	526.27	163.054	85810.7	4197	41.4	20.83				moraine-type，tongue-shaped
ZDSRG-016	30.0641	101.889	4407	546.28	167.926	91734.7	4331	50.3	44.92				moraine-type，tongue-shaped
ZDSRG-017	30.0654	101.887	4423	335.43	158.759	53252.4	4362	43	47.7				moraine-type，tongue-shaped
ZDSRG-018	30.0652	101.883	4449	553.21	160.541	88812.6	4410	47.5	48.84				moraine-type，tongue-shaped
ZDSRG-019	30.0643	101.879	4548	374.52	170.455	63838.7	4535	37.9	22.28				moraine-type，tongue-shaped
ZDSRG-020	30.0692	101.875	4563	520.24	139.432	72538.3	4516	26.7	89.03				moraine-type，tongue-shaped
ZDSRG-021	30.07	101.872	4607	305.58	231.804	70834.7	4581	28.6	23.36				moraine-type，tongue-shaped
ZDSRG-022	30.0714	101.87	4624	227.34	98.2206	22329.5	4609	28.2	52.1				moraine-type，tongue-shaped
ZDSRG-023	30.0732	101.87	4621	224.62	160.881	36137	4597	26.2	100.44				moraine-type，tongue-shaped
ZDSRG-024	30.0734	101.876	4496	208.74	296.844	61963.1	4449	33.9	84.14				moraine-type，lobate-shaped
ZDSRG-025	30.0712	101.878	4411	359.38	204.505	73494.9	4365	40.8	63.85				moraine-type，tongue-shaped
ZDSRG-026	30.069	101.885	4301	291.56	185.527	54092.2	4278	35.3	78.4				moraine-type，tongue-shaped
ZDSRG-027	30.0761	101.878	4473	545.42	100.907	55036.5	4404	23	105.42				moraine-type，tongue-shaped
ZDSRG-028	30.0794	101.874	4543	424.7	123.479	52441.7	4492	16.3	52.91				moraine-type，tongue-shaped
ZDSRG-029	30.086	101.89	4194	816.25	194.551	158802	4033	37.4	42.96				moraine-type，tongue-shaped
ZDSRG-030	30.0854	101.886	4310	159.08	53.7134	8544.72	4300	52.6	40.13				moraine-type，tongue-shaped
ZDSRG-031	30.0878	101.884	4327	672.14	202.938	136403	4123	34.5	69.37				moraine-type，tongue-shaped
ZDSRG-032	30.0948	101.89	4192	930.08	112.752	104869	3986	31	163.78				moraine-type，tongue-shaped
ZDSRG-033	30.0936	101.894	4075	969.07	140.704	136352	3824	42.5	125.33				moraine-type，tongue-shaped
ZDSRG-034	30.1022	101.894	4131	1326.92	400.128	530937	3944	31.5	73.34				moraine-type，tongue-shaped
ZDSRG-035	30.1022	101.885	4221	723.32	409.001	295838	4113	36	311.84				moraine-type，tongue-shaped
ZDSRG-036	30.0955	101.882	4279	395.68	190.52	75385	4248	24.2	270.03				moraine-type，tongue-shaped
ZDSRG-037	30.0914	101.881	4395	147.73	699.953	103404	4286	56.7	280.49				moraine-type，lobate-shaped
ZDSRG-038	30.0856	101.881	4476	330.8	160.123	52968.8	4438	33	328.15				moraine-type，tongue-shaped
ZDSRG-039	30.0848	101.876	4468	453.07	649.006	294045	4364	42.7	332.87				moraine-type，lobate-shaped
ZDSRG-040	30.1028	101.869	4409	589.51	298.876	176190	4306	39.9	343.95				moraine-type，tongue-shaped
ZDSRG-041	30.0964	101.864	4398	438.51	284.47	124743	4383	46.7	313.73				moraine-type，tongue-shaped
ZDSRG-042	30.0762	101.862	4593	239.56	361.189	86526.4	4566	41.7	33.96				moraine-type，lobate-shaped
ZDSRG-043	30.0774	101.856	4641	557.49	375.954	209590	4602	23.6	60.46				moraine-type，tongue-shaped
ZDSRG-044	30.0845	101.847	4658	535.13	188.186	100704	4570	40.1	15.9				moraine-type，lobate-shaped
ZDSRG-045	30.0881	101.843	4620	402.39	141.818	57066	4597	32.8	60.73				moraine-type，tongue-shaped
ZDSRG-046	30.0901	101.84	4641	459.92	827.295	380490	4510	30.8	12.55				moraine-type，lobate-shaped
ZDSRG-047	30.0919	101.832	4626	306.25	320.59	98180.5	4594	26.2	28.56				moraine-type，lobate-shaped
ZDSRG-048	30.0964	101.831	4698	418.53	592.054	247792	4549	41.9	83				moraine-type，lobate-shaped
ZDSRG-049	30.1017	101.828	4675	525.91	115.969	60989.3	4586	36.3	83.86				moraine-type，tongue-shaped
ZDSRG-050	30.1068	101.833	4579	228.67	255.048	58321.9	4560	32.4	299.36				moraine-type，lobate-shaped
ZDSRG-051	30.1095	101.84	4493	258.68	485.708	125643	4442	25.7	340.6				moraine-type，lobate-shaped
ZDSRG-052	30.0987	101.824	4705	709.29	312.701	221796	4618	23.5	310.66				moraine-type，tongue-shaped
ZDSRG-053	30.1119	101.83	4506	397.69	248.788	98940.5	4468	26.4	122.07	441.69	79	4585	talus-type，tongue-shaped
ZDSRG-054	30.1149	101.832	4422	386.04	253.678	97930	4375	47.4	73.78				moraine-type，tongue-shaped
ZDSRG-055	30.1192	101.834	4375	230.1	467.034	107465	4349	26	121.66	663.07	116	4491	talus-type，lobate-shaped
ZDSRG-056	30.1032	101.826	4701	391.55	162.291	63544.9	4636	32.8	11.58				moraine-type，tongue-shaped
ZDSRG-057	30.1063	101.822	4673	585.59	608.075	356083	4543	37.5	42.18				moraine-type，lobate-shaped
ZDSRG-058	30.1089	101.816	4577	1480.92	432.499	640496	4456	20.9	36.53				moraine-type，tongue-shaped
ZDSRG-059	30.111	101.809	4578	1271.84	311.044	395598	4401	31.3	36.22				moraine-type，tongue-shaped
ZDSRG-060	30.1137	101.806	4597	1352.65	257.478	348278	4387	24.4	53.6				moraine-type，tongue-shaped
ZDSRG-061	30.1178	101.803	4595	1427.65	497.609	710412	4414	32.2	86.63				moraine-type，tongue-shaped
ZDSRG-062	30.1277	101.811	4307	421.93	1801.52	760116	4258	26.7	104.55	1543.3	192	4499	talus-type，lobate-shaped
ZDSRG-063	30.1156	101.828	4447	518.35	1229.28	637195	4338	37.8	294.62				moraine-type，lobate-shaped
ZDSRG-064	30.1301	101.809	4399	415.12	1048.09	435084	4337	34.2	341.56				moraine-type，lobate-shaped
ZDSRG-065	30.1211	101.8	4605	540.91	231.375	125153	4511	50.2	51.95				moraine-type，tongue-shaped
ZDSRG-066	30.1302	101.787	4689	1051.17	2659.34	2.79542e+06	4327	32.9	44.89				moraine-type，lobate-shaped
ZDSRG-067	30.1448	101.779	4507	1666.94	439.836	733181	4289	26.2	83.69				moraine-type，tongue-shaped
ZDSRG-068	30.148	101.774	4630	645.21	215.896	139298	4480	39.7	65.33				moraine-type，tongue-shaped
ZDSRG-069	30.168	101.752	4566	1233.31	291.344	359318	4447	15.5	283.06				moraine-type，tongue-shaped
ZDSRG-070	30.1476	101.765	4660	1003.18	365.642	366804	4541	26.6	289.32				moraine-type，tongue-shaped
ZDSRG-071	30.1438	101.762	4614	530.58	496.711	263545	4442	47.7	260.66				moraine-type，tongue-shaped
ZDSRG-072	30.1409	101.764	4578	1079.76	223.278	241086	4377	34.5	227.33				moraine-type，tongue-shaped
ZDSRG-073	30.1415	101.769	4689	818.69	214.085	175269	4564	18.9	195.56				moraine-type，tongue-shaped
ZDSRG-074	30.1252	101.774	4555	1478.63	332.481	491617	4363	29.8	220.57				moraine-type，tongue-shaped
ZDSRG-075	30.1234	101.777	4557	1202.48	280.623	337443	4405	38.9	222.48				moraine-type，tongue-shaped
ZDSRG-076	30.1217	101.781	4681	975.17	471.326	459623	4456	28.3	218.39				moraine-type，tongue-shaped
ZDSRG-077	30.1163	101.785	4571	1247.79	628.259	783936	4448	31.7	220.34				moraine-type，tongue-shaped
ZDSRG-078	30.1118	101.788	4594	1784.71	397.697	709774	4410	27.5	226.81				moraine-type，tongue-shaped
ZDSRG-079	30.1097	101.792	4680	1702.58	268.012	456311	4464	25.8	212.42				moraine-type，tongue-shaped
ZDSRG-080	30.1082	101.797	4646	1582.09	253.265	400688	4508	18.5	186.91				moraine-type，tongue-shaped
ZDSRG-081	30.1042	101.801	4591	1179.18	488.727	576297	4490	24	204.85				moraine-type，tongue-shaped
ZDSRG-082	30.1015	101.805	4626	1156.23	297.667	344171	4511	21.4	223.7				moraine-type，tongue-shaped
ZDSRG-083	30.0984	101.807	4618	1409.44	439.291	619154	4475	25.1	219.41				moraine-type，tongue-shaped
ZDSRG-084	30.0934	101.813	4550	2103.94	370.243	778970	4363	22	186.75				moraine-type，tongue-shaped
ZDSRG-085	30.0997	101.819	4631	379.71	191.955	72887.1	4580	55.4	175.52				moraine-type，tongue-shaped
ZDSRG-086	30.0952	101.822	4632	626.48	259.505	162575	4511	35.6	226.19				moraine-type，tongue-shaped
ZDSRG-087	30.0916	101.822	4622	1064.92	337.501	359411	4424	24.2	221.79				moraine-type，tongue-shaped
ZDSRG-088	30.0907	101.826	4576	1145.31	301.618	345446	4447	29.3	206.06				moraine-type，tongue-shaped
ZDSRG-089	30.09	101.831	4570	189.08	440.847	83355.3	4536	35.2	162.91	474.13	86	4656	talus-type，lobate-shaped
ZDSRG-090	30.0849	101.829	4519	422.96	128.142	54198.9	4477	29.7	261.76				moraine-type，tongue-shaped
ZDSRG-091	30.0788	101.827	4472	706.03	750.846	530120	4363	30	288.43				moraine-type，lobate-shaped
ZDSRG-093	30.0675	101.819	4234	521.74	293.557	153161	4174	34.4	237.88	517.65	266	4500	talus-type，tongue-shaped
ZDSRG-094	30.0741	101.83	4446	556.1	150.384	83628.6	4389	21.5	124.61				moraine-type，tongue-shaped
ZDSRG-095	30.0782	101.832	4473	258.37	1147.05	296362	4400	22.2	104.91	894.56	139	4612	talus-type，lobate-shaped
ZDSRG-096	30.0847	101.836	4625	444.51	449.769	199927	4562	32	178.71				moraine-type，lobate-shaped
ZDSRG-097	30.0821	101.842	4539	872.3	566.756	494381	4474	19.4	218.12				moraine-type，tongue-shaped
ZDSRG-098	30.0776	101.845	4541	1231.8	321.136	395576	4438	16.1	231.83				moraine-type，tongue-shaped
ZDSRG-099	30.076	101.849	4638	922.96	238.793	220397	4544	17.4	222.65				moraine-type，tongue-shaped
ZDSRG-100	30.072	101.852	4534	987.02	399.659	394472	4450	27.1	187.86				moraine-type，tongue-shaped
ZDSRG-101	30.0679	101.84	4411	1285.23	505.719	649965	4288	18.2	231.51				moraine-type，tongue-shaped
ZDSRG-102	30.062	101.835	4319	889.67	365.605	325267	4227	33	301.43				moraine-type，tongue-shaped
ZDSRG-103	30.0561	101.832	4238	1029.92	275.794	284046	4089	28.3	249.15				moraine-type，tongue-shaped
ZDSRG-104	30.0524	101.853	4466	831.67	352.942	293531	4303	29.9	332.07				moraine-type，tongue-shaped
ZDSRG-105	30.0661	101.87	4601	446.85	231.714	103541	4528	28.5	211.7				moraine-type，tongue-shaped
ZDSRG-106	30.0636	101.875	4545	367.34	739.938	271809	4481	23.7	216.97				moraine-type，lobate-shaped
ZDSRG-107	30.0596	101.878	4546	689.99	198.868	137217	4480	20.3	202.93				moraine-type，tongue-shaped
ZDSRG-108	30.0558	101.879	4476	354.09	182.763	64714.6	4459	41.1	231.1				moraine-type，tongue-shaped
ZDSRG-109	30.0539	101.88	4487	348.92	270.721	94459.8	4454	41.8	210.64				moraine-type，tongue-shaped
ZDSRG-110	30.0499	101.881	4515	497.67	210.644	104831	4471	39.3	323.06				moraine-type，tongue-shaped
ZDSRG-111	30.0522	101.877	4471	358.82	245.687	88157.5	4418	47.1	10.66				moraine-type，tongue-shaped
ZDSRG-112	30.0489	101.877	4462	1033.06	404.611	417987	4340	20.6	307.59				moraine-type，tongue-shaped
ZDSRG-113	30.0433	101.868	4237	1800.55	577.586	1.03997e+06	3917	28.9	243.25				moraine-type，tongue-shaped
ZDSRG-114	30.0382	101.878	4369	1914.56	349.777	669668	4097	23.7	215.79				moraine-type，tongue-shaped
ZDSRG-115	30.035	101.888	4382	677.66	145.032	98282.6	4295	22.3	260.72				moraine-type，tongue-shaped
ZDSRG-116	30.0331	101.885	4294	423.87	198.347	84073.3	4223	34.6	275.49				moraine-type，tongue-shaped
ZDSRG-117	30.0334	101.893	4363	777.15	193.544	150413	4283	21.5	213.41				moraine-type，tongue-shaped
ZDSRG-118	30.0281	101.888	4210	825.48	207.148	170997	4010	33.1	244.37				moraine-type，tongue-shaped
ZDSRG-119	30.0239	101.899	4224	597.8	241.389	144302	4079	27.9	255.12				moraine-type，tongue-shaped
ZDSRG-120	30.0211	101.899	4184	411.65	164.95	67901.8	4123	42.7	274.82				moraine-type，tongue-shaped
ZDSRG-121	30.0333	101.897	4381	710.65	182.89	129971	4318	15.6	207.63				moraine-type，tongue-shaped
ZDSRG-122	30.031	101.903	4313	824.46	182.678	150611	4236	18.8	189.1				moraine-type，tongue-shaped
ZDSRG-123	30.0286	101.908	4261	246.54	334.236	82402.5	4238	19.1	34.91				moraine-type，lobate-shaped
ZDSRG-124	30.0332	101.908	4333	724.82	159.172	115371	4210	14.9	101.2				moraine-type，tongue-shaped
ZDSRG-125	30.1416	101.879	4362	604.64	268.714	162475	4283	27.8	241.33				moraine-type，tongue-shaped
ZDSRG-126	30.1335	101.884	4359	564.43	273.213	154210	4235	31.5	214.34				moraine-type，tongue-shaped
ZDSRG-127	30.1751	101.845	4356	1225.03	331.724	406371	4201	28.1	200.74				moraine-type，tongue-shaped
ZDSRG-128	30.1787	101.841	4430	948.57	189.809	180047	4298	27.6	221.61				moraine-type，tongue-shaped
ZDSRG-129	30.1841	101.836	4504	908.69	214.032	194489	4382	22.3	213.82				moraine-type，tongue-shaped
ZDSRG-130	30.191	101.832	4629	338.97	178.214	60409.4	4590	29.6	220.4				moraine-type，tongue-shaped
ZDSRG-131	30.1891	101.819	4497	945.57	381.163	360417	4406	21.6	236.65				moraine-type，tongue-shaped
ZDSRG-132	30.184	101.82	4475	230.22	422.488	97265.3	4399	42.2	276.48				moraine-type，lobate-shaped
ZDSRG-134	30.1883	101.807	4445	148.17	67.3459	9978.64	4439	52.4	268.31				moraine-type，tongue-shaped
ZDSRG-135	30.1915	101.797	4490	437.1	193.833	84724.3	4458	39.4	184.7				moraine-type，tongue-shaped
ZDSRG-136	30.1908	101.8	4504	322.17	310.117	99910.3	4444	31.6	190.77				moraine-type，tongue-shaped
ZDSRG-137	30.1875	101.796	4414	354.61	133.727	47420.9	4330	27.7	154.38				moraine-type，tongue-shaped
ZDSRG-138	30.1913	101.793	4430	1104.81	259.782	287010	4301	30.9	205.51				moraine-type，tongue-shaped
ZDSRG-139	30.1872	101.794	4341	332.16	200.071	66455.5	4331	43.9	194.94				moraine-type，tongue-shaped
ZDSRG-140	30.1979	101.795	4573	379.43	212.988	80813.9	4540	32	228.11				moraine-type，tongue-shaped
ZDSRG-141	30.2011	101.794	4629	328.94	166.139	54649.6	4612	32.6	292.76				moraine-type，tongue-shaped
ZDSRG-142	30.2045	101.79	4592	173.18	116.423	20162.1	4571	47.6	196.25				moraine-type，tongue-shaped
ZDSRG-143	30.2037	101.784	4524	512.5	69.1954	35462.6	4469	20	236.45				moraine-type，tongue-shaped
ZDSRG-144	30.2091	101.785	4576	1307.27	309.563	404682	4492	16.5	239.91				moraine-type，tongue-shaped
ZDSRG-145	30.2062	101.78	4525	425.08	102.82	43706.8	4499	23.3	279.59				moraine-type，tongue-shaped
ZDSRG-146	30.214	101.788	4666	185.74	340.994	63336.2	4593	42	257.78				moraine-type，lobate-shaped
ZDSRG-147	30.2166	101.783	4553	525.26	190.061	99831.6	4492	15.1	275.69				moraine-type，tongue-shaped
ZDSRG-148	30.2183	101.777	4491	608.37	265.42	161473	4398	18.6	282.76				moraine-type，tongue-shaped
ZDSRG-150	30.2274	101.775	4311	366.19	195.024	71415.7	4298	35.4	286.67				moraine-type，tongue-shaped
ZDSRG-151	30.2303	101.772	4236	717.7	263.742	189287	3987	38	285.61				moraine-type，tongue-shaped
ZDSRG-152	30.234	101.775	4171	845.66	194.519	164497	3921	44.9	298.11				moraine-type，tongue-shaped
ZDSRG-153	30.2284	101.782	4394	2174.29	349.717	760387	4151	21.8	352.04				moraine-type，tongue-shaped
ZDSRG-154	30.2173	101.792	4544	426.49	624.825	266482	4498	33	323.32				moraine-type，lobate-shaped
ZDSRG-155	30.2216	101.794	4562	628.13	330.192	207404	4461	29.1	292.87				moraine-type，tongue-shaped
ZDSRG-156	30.2308	101.789	4389	2362.15	198.517	468928	4176	17.5	325.85				moraine-type，tongue-shaped
ZDSRG-157	30.2338	101.792	4391	2242.1	281.056	630156	4155	18.1	325.72				moraine-type，tongue-shaped
ZDSRG-158	30.2292	101.8	4521	299.14	486.49	145529	4487	32.1	322.29				moraine-type，lobate-shaped
ZDSRG-159	30.2378	101.796	4408	883.26	125.261	110638	4298	22.6	305.71				moraine-type，tongue-shaped
ZDSRG-160	30.2416	101.792	4297	464.49	87.8253	40794	4228	26.9	297.6				moraine-type，tongue-shaped
ZDSRG-161	30.2433	101.792	4313	1010.33	176.13	177949	4144	28.9	291.65				moraine-type，tongue-shaped
ZDSRG-162	30.2435	101.805	4370	1947.85	218.97	426520	4047	23.7	346.3				moraine-type，tongue-shaped
ZDSRG-163	30.2423	101.799	4393	1388.57	222.275	308645	4153	19.4	357.64				moraine-type，tongue-shaped
ZDSRG-164	30.2522	101.805	4091	1109.98	167.952	186423	3846	52	331.62				moraine-type，tongue-shaped
ZDSRG-165	30.2519	101.797	4089	663.34	227.18	150698	3954	41.6	322.73				moraine-type，tongue-shaped
ZDSRG-166	30.2482	101.794	4182	1232.28	309	380775	3939	34.8	346.69				moraine-type，tongue-shaped
ZDSRG-167	30.2253	101.803	4407	1253.59	363.334	455471	4148	30.7	83.74				moraine-type，tongue-shaped
ZDSRG-168	30.2197	101.802	4420	810.39	153.594	124471	4270	49.3	105.02				moraine-type，tongue-shaped
ZDSRG-169	30.2129	101.795	4593	1505.31	470.506	708258	4419	11	33.98				moraine-type，tongue-shaped
ZDSRG-170	30.2039	101.802	4501	176.1	147.555	25984.4	4482	47.4	93.99				moraine-type，tongue-shaped
ZDSRG-171	30.2068	101.803	4495	320.74	148.396	47596.5	4445	28.6	95.73				moraine-type，tongue-shaped
ZDSRG-172	30.1938	101.799	4577	587.35	111.027	65211.6	4531	18.1	114.71				moraine-type，tongue-shaped
ZDSRG-173	30.1772	101.852	4374	799.26	187.336	149730	4177	32.2	72.14				moraine-type，tongue-shaped
ZDSRG-174	30.1838	101.848	4377	1154.32	587.681	678372	4153	35.3	107.11				moraine-type，tongue-shaped
ZDSRG-175	30.1896	101.851	4321	517.61	630.82	326519	4270	35.43	34.96				moraine-type，tongue-shaped
ZDSRG-176	30.1955	101.858	4059	1055.86	154.625	163262	3890	32.8	44.94				moraine-type，tongue-shaped
ZDSRG-177	30.1957	101.848	4291	1537.55	425.425	654113	4070	34.7	66.48				moraine-type，tongue-shaped
ZDSRG-178	30.1999	101.848	4314	1319.87	217.957	287675	4101	33.3	88.67				moraine-type，tongue-shaped
ZDSRG-179	30.1998	101.837	4644	649.96	862.16	560369	4534	30.6	62.01				moraine-type，lobate-shaped
ZDSRG-180	30.206	101.84	4524	2139.26	442.7	947049	4160	25.5	97.41				moraine-type，tongue-shaped
ZDSRG-181	30.2083	101.845	4427	1211.38	293.323	355325	4198	37.4	112.41				moraine-type，tongue-shaped
ZDSRG-182	30.2109	101.849	4363	653.29	257.742	168380	4288	43.5	150.98				moraine-type，tongue-shaped
ZDSRG-183	30.2125	101.852	4364	644.61	229.361	147848	4259	40	152.74				moraine-type，tongue-shaped
ZDSRG-184	30.2132	101.856	4379	655.94	227.112	148972	4273	44.2	139.65				moraine-type，tongue-shaped
ZDSRG-185	30.2136	101.861	4291	864.15	169.853	146779	4111	35.6	141.53				moraine-type，tongue-shaped
ZDSRG-186	30.2158	101.872	4192	583.42	310.712	181276	4069	47.1	54.37				moraine-type，tongue-shaped
ZDSRG-187	30.2254	101.868	4076	963.24	134.415	129474	3802	51.4	351.79				moraine-type，tongue-shaped
ZDSRG-188	30.2244	101.866	4134	1109.54	118.214	131163	3820	49.2	1.12				moraine-type，tongue-shaped
ZDSRG-189	30.2233	101.862	4205	1206.97	235.968	284807	3991	36.8	338.71				moraine-type，tongue-shaped
ZDSRG-190	30.2196	101.859	4318	738.11	238.603	176115	4191	27.8	319.99				moraine-type，tongue-shaped
ZDSRG-191	30.2169	101.856	4434	515.75	174.01	89745.4	4364	37.5	60.3				moraine-type，tongue-shaped
ZDSRG-192	30.2179	101.851	4384	1542.05	173.008	266788	4178	26	43.35				moraine-type，tongue-shaped
ZDSRG-193	30.218	101.842	4508	2194.41	779.6	1.71076e+06	4222	29.1	66.66				moraine-type，tongue-shaped
ZDSRG-194	30.231	101.852	4292	2009.31	235.886	473968	3937	20	35.81				moraine-type，tongue-shaped
ZDSRG-195	30.2319	101.841	4551	511.77	523.223	267770	4369	38.5	83.6				moraine-type，tongue-shaped
ZDSRG-196	30.2283	101.841	4534	647.65	150.484	97461.1	4419	31.7	110.92				moraine-type，tongue-shaped
ZDSRG-197	30.2272	101.839	4531	395.79	191.847	75931	4503	26.9	90.17				moraine-type，tongue-shaped
ZDSRG-198	30.2366	101.843	4436	624.86	188.535	117808	4310	29.1	76.41				moraine-type，tongue-shaped
ZDSRG-199	30.2388	101.837	4534	726.35	200.651	145743	4479	25.5	42.46				moraine-type，tongue-shaped
ZDSRG-201	30.2266	101.83	4658	958.05	403.502	386575	4515	37.3	37.02				moraine-type，tongue-shaped
ZDSRG-202	30.2315	101.825	4494	1066.18	518.933	553276	4318	42	9.57				moraine-type，tongue-shaped
ZDSRG-203	30.2328	101.828	4435	3184.45	210.653	670813	3949	23.3	322.87				moraine-type，tongue-shaped
ZDSRG-204	30.2249	101.819	4562	1185.58	295.453	350283	4226	40.5	259.63				moraine-type，tongue-shaped
ZDSRG-205	30.2213	101.822	4538	1482.25	356	527681	4305	39.5	268.24				moraine-type，tongue-shaped
ZDSRG-206	30.2155	101.823	4506	2125.75	659.498	1.40193e+06	4156	24.5	289.43				moraine-type，tongue-shaped
ZDSRG-207	30.2067	101.827	4682	902.09	415.602	374910	4572	19.4	320.88				moraine-type，tongue-shaped
ZDSRG-208	30.2072	101.821	4573	941.52	378.136	356023	4484	26.5	301.47				moraine-type，tongue-shaped
ZDSRG-209	30.2035	101.821	4606	2357.54	242.782	572367	4332	18.3	296.1				moraine-type，tongue-shaped
ZDSRG-210	30.1874	101.826	4560	420.43	230.257	96806.7	4506	28.1	157.77				moraine-type，tongue-shaped
ZDSRG-211	30.1891	101.826	4611	729.01	112.925	82323.7	4531	22.8	157.15				moraine-type，tongue-shaped
ZDSRG-212	30.189	101.833	4606	333.65	245.473	81902.1	4529	36.4	177.95				moraine-type，tongue-shaped
ZDSRG-213	30.1782	101.833	4371	250.69	479.218	120135	4269	40	270.67				moraine-type，lobate-shaped
ZDSRG-214	30.2134	101.782	4504	442.6	338.306	149734	4452	22.3	290.29				moraine-type，tongue-shaped
ZDSRG-215	30.1878	101.841	4563	515.65	452.49	233326	4473	28.2	29.2				moraine-type，tongue-shaped
ZDSRG-216	30.1913	101.835	4665	199.98	376.081	75208.6	4601	31.2	87.54				moraine-type，lobate-shaped
ZDSRG-217	30.1941	101.837	4617	995.65	196.862	196006	4526	23.2	123.66				moraine-type，tongue-shaped
ZDSRG-218	30.1866	101.857	4115	864.69	564.047	487726	3853	42.6	148.8				moraine-type，tongue-shaped
ZDSRG-219	30.2249	101.757	4267	597.84	177.919	106367	4068	47.6	96.78				moraine-type，tongue-shaped
ZDSRG-220	30.2331	101.757	4269	519.85	231.712	120455	4206	28.7	117.2	335.08	183	4452	talus-type，tongue-shaped
ZDSRG-223	30.2433	101.759	4341	450.31	137.251	61805.6	4253	47.4	122.03				moraine-type，tongue-shaped
ZDSRG-225	30.2362	101.749	4499	231.78	130.015	30134.8	4479	36.8	119.32				moraine-type，tongue-shaped
ZDSRG-226	30.2328	101.745	4419	339.16	147.315	49963.3	4401	34.5	252.06				moraine-type，tongue-shaped
ZDSRG-227	30.2454	101.748	4605	213.26	373.104	79568.1	4572	26.2	8.09				moraine-type，lobate-shaped
ZDSRG-228	30.2483	101.756	4426	1138.82	824.912	939426	4221	21.3	107.92				moraine-type，tongue-shaped
ZDSRG-230	30.2581	101.766	4371	606.96	187.63	113884	4266	30.3	73.77				moraine-type，tongue-shaped
ZDSRG-232	30.2637	101.766	4250	789.45	173.592	137042	4070	35.7	30.21				moraine-type，tongue-shaped
ZDSRG-233	30.269	101.758	4328	130.65	1175.59	153591	4135	61.5	113.03	914.32	86	4414	talus-type，lobate-shaped
ZDSRG-234	30.2705	101.754	4251	896.54	270.861	242838	4131	31.3	331.75				moraine-type，tongue-shaped
ZDSRG-235	30.2665	101.751	4322	606.1	176.553	107009	4288	22.1	304.03				moraine-type，tongue-shaped
ZDSRG-236	30.2733	101.757	4143	584.07	379.669	221753	4011	64.08	25.88				moraine-type，tongue-shaped
ZDSRG-237	30.2607	101.75	4507	688.72	293.225	201950	4390	27.1	342.8				moraine-type，tongue-shaped
ZDSRG-238	30.259	101.746	4491	602.58	294.502	177461	4407	28	324.57				moraine-type，tongue-shaped
ZDSRG-239	30.2576	101.74	4550	658.86	617.569	406892	4442	28	2.59				moraine-type，tongue-shaped
ZDSRG-240	30.2599	101.734	4539	229.63	456.231	104764	4510	15.6	57.55				moraine-type，lobate-shaped
ZDSRG-241	30.2542	101.737	4554	930.89	237.056	220673	4445	23.5	267.71				moraine-type，tongue-shaped
ZDSRG-244	30.2579	101.726	4479	641.34	480.277	308021	4374	27.9	253.99				moraine-type，tongue-shaped
ZDSRG-245	30.2757	101.724	4567	549.85	2064.58	1.13521e+06	4449	30.4	255.98				moraine-type，lobate-shaped
ZDSRG-246	30.2759	101.71	4628	394.71	253.861	100201	4546	39	167.54				moraine-type，tongue-shaped
ZDSRG-247	30.2781	101.712	4596	426.51	257.042	109631	4526	41.8	100.53				moraine-type，tongue-shaped
ZDSRG-248	30.2715	101.709	4523	420.8	396.898	167015	4476	46.5	110.67				moraine-type，tongue-shaped
ZDSRG-249	30.2663	101.71	4497	347.5	80.5592	27994.3	4453	34	112.36				moraine-type，tongue-shaped
ZDSRG-250	30.2635	101.711	4456	321.08	311.14	99900.8	4410	52.1	102.43				moraine-type，tongue-shaped
ZDSRG-251	30.2638	101.706	4449	420.47	803.92	338024	4335	36.7	289.62				moraine-type，lobate-shaped
ZDSRG-252	30.2698	101.703	4489	1006.85	332.513	334791	4402	27	269.65				moraine-type，tongue-shaped
ZDSRG-254	30.2792	101.708	4575	591.65	515.481	304984	4469	36.1	300.41				moraine-type，tongue-shaped
ZDSRG-256	30.2906	101.718	4716	646	432.127	279154	4596	37.5	274.74				moraine-type，tongue-shaped
ZDSRG-257	30.2943	101.71	4605	1173.07	322.164	377921	4462	21.9	188.92				moraine-type，tongue-shaped
ZDSRG-258	30.2868	101.684	4487	311.12	114.731	35695	4476	43.5	261.42				moraine-type，tongue-shaped
ZDSRG-259	30.2887	101.687	4544	299.3	103.232	30897.3	4539	30.8	258.24				moraine-type，tongue-shaped
ZDSRG-260	30.2907	101.689	4603	160.44	252.838	40565.3	4576	51.2	296.67				moraine-type，lobate-shaped
ZDSRG-261	30.3017	101.69	4793	1905.44	641.398	1.22215e+06	4512	29.3	210.55				moraine-type，tongue-shaped
ZDSRG-262	30.3136	101.686	4913	1066.1	1451.64	1.54759e+06	4643	43.7	245.59				moraine-type，lobate-shaped
ZDSRG-263	30.3194	101.672	4725	1272.75	246.637	313908	4522	25.6	249.91				moraine-type，tongue-shaped
ZDSRG-264	30.3173	101.677	4729	1521.22	213.702	325088	4563	26.6	239.45				moraine-type，tongue-shaped
ZDSRG-265	30.3222	101.673	4740	547.81	208.297	114107	4622	38.6	263.36				moraine-type，tongue-shaped
ZDSRG-266	30.3249	101.675	4767	682.22	304.354	207637	4669	21.7	279.05				moraine-type，tongue-shaped
ZDSRG-267	30.3212	101.663	4539	1268.9	218.771	277599	4386	17.9	238.57				moraine-type，tongue-shaped
ZDSRG-268	30.3312	101.665	4605	1697.55	465.328	789918	4427	23.5	238.51				moraine-type，tongue-shaped
ZDSRG-269	30.3366	101.663	4658	1365	263.684	359928	4492	23.9	232.47				moraine-type，tongue-shaped
ZDSRG-270	30.3451	101.662	4706	731.78	203.091	148618	4585	31.6	242.39				moraine-type，tongue-shaped
ZDSRG-271	30.3404	101.661	4614	1639.52	331.652	543751	4436	25.8	232.21				moraine-type，tongue-shaped
ZDSRG-272	30.3474	101.659	4605	998.67	344.084	343626	4500	29.5	235.94				moraine-type，tongue-shaped
ZDSRG-273	30.3584	101.657	4686	681.7	336.294	229251	4602	27.7	229.13				moraine-type，tongue-shaped
ZDSRG-274	30.3541	101.657	4630	428.49	479.06	205272	4576	39.8	259.9				moraine-type，lobate-shaped
ZDSRG-275	30.3607	101.652	4703	1183.86	189.96	224886	4528	28.7	233.93				moraine-type，tongue-shaped
ZDSRG-276	30.3551	101.645	4501	502.66	159.714	80281.9	4425	27.1	255.76				moraine-type，tongue-shaped
ZDSRG-277	30.3524	101.643	4426	261.11	112.721	29432.7	4418	38.6	261.73				moraine-type，tongue-shaped
ZDSRG-278	30.3681	101.648	4657	307.97	783.764	241376	4511	31.9	225.07				moraine-type，lobate-shaped
ZDSRG-279	30.374	101.646	4528	819.09	358.07	293291	4421	30.2	312.71				moraine-type，tongue-shaped
ZDSRG-280	30.3766	101.649	4466	513.87	204.185	104925	4403	36.6	334.44				moraine-type，tongue-shaped
ZDSRG-281	30.3667	101.655	4680	796.03	252.711	201166	4542	35.9	1.07				moraine-type，tongue-shaped
ZDSRG-282	30.3718	101.651	4589	174.04	532.753	92720.3	4578	40.9	94.09				moraine-type，lobate-shaped
ZDSRG-283	30.3745	101.659	4628	396.97	1442.5	572628	4548	51.6	251.52				moraine-type，lobate-shaped
ZDSRG-286	30.3981	101.656	4575	586.07	289.491	169662	4470	38.6	340.69				moraine-type，tongue-shaped
ZDSRG-287	30.4033	101.653	4401	639.28	200.4	128112	4246	36.6	3.71				moraine-type，tongue-shaped
ZDSRG-288	30.3995	101.664	4631	958.14	153.245	146830	4466	18.6	310.76				moraine-type，tongue-shaped
ZDSRG-289	30.4052	101.663	4463	1608.66	255.355	410779	4171	30.7	321.65				moraine-type，tongue-shaped
ZDSRG-290	30.4088	101.664	4418	1689.72	244.413	412989	4056	30.5	320.27				moraine-type，tongue-shaped
ZDSRG-291	30.4133	101.666	4353	1220.31	598.995	730959	3991	38	313.36				moraine-type，tongue-shaped
ZDSRG-292	30.379	101.663	4628	635.41	240.443	152780	4119	44.3	73.33				moraine-type，tongue-shaped
ZDSRG-293	30.3742	101.664	4583	716	441.815	316339	4448	36.2	84.63				moraine-type，tongue-shaped
ZDSRG-294	30.364	101.659	4781	332.43	137.171	45599.7	4747	50.1	49.46				moraine-type，tongue-shaped
ZDSRG-295	30.3613	101.663	4682	890.76	320.362	285365	4552	20.1	58.2				moraine-type，tongue-shaped
ZDSRG-296	30.3567	101.661	4743	343.1	143.964	49393.9	4681	44.2	198.05				moraine-type，tongue-shaped
ZDSRG-297	30.3505	101.67	4664	734.76	251.664	184912	4447	35.6	62.34				moraine-type，tongue-shaped
ZDSRG-298	30.3467	101.671	4753	645.71	305.588	197321	4553	41.5	61.1				moraine-type，tongue-shaped
ZDSRG-299	30.3414	101.672	4741	1103.96	469.353	518147	4564	34	15.67				moraine-type，tongue-shaped
ZDSRG-301	30.3327	101.677	4746	869.17	214.585	186511	4563	32.7	40.78				moraine-type，tongue-shaped
ZDSRG-302	30.3308	101.681	4701	919.74	366.521	337104	4564	32.2	11.82				moraine-type，tongue-shaped
ZDSRG-303	30.3278	101.677	4825	361.49	578.171	209003	4802	21.2	36.05				moraine-type，lobate-shaped
ZDSRG-304	30.3427	101.693	4803	1497.69	560.012	838724	4620	25.3	215				moraine-type，tongue-shaped
ZDSRG-305	30.3422	101.685	4655	1025.04	453.047	464391	4400	46	237.89				moraine-type，tongue-shaped
ZDSRG-306	30.3534	101.688	4768	1535.23	538.45	826644	4387	43.3	284.56				moraine-type，tongue-shaped
ZDSRG-307	30.3475	101.685	4630	886.8	276.376	245091	4310	53.6	265.5				moraine-type，tongue-shaped
ZDSRG-308	30.319	101.705	4795	1276.99	939.442	1.19966e+06	4648	26.9	116.94				moraine-type，tongue-shaped
ZDSRG-309	30.3116	101.708	4709	981.24	345.012	338540	4531	38.5	39.07				moraine-type，tongue-shaped
ZDSRG-310	30.3075	101.712	4686	899.19	444.78	399942	4446	39.7	57.51				moraine-type，tongue-shaped
ZDSRG-311	30.3061	101.717	4490	1039.19	386.255	401392	4268	53.7	64.83				moraine-type，tongue-shaped
ZDSRG-312	30.2943	101.724	4429	1216.59	2133.61	2.59573e+06	4043	50.7	49.96				moraine-type，tongue-shaped
ZDSRG-313	30.2792	101.731	4522	868.45	1326.35	1.15187e+06	4358	24.8	39.44				moraine-type，lobate-shaped
ZDSRG-314	30.2782	101.745	4494	1231.03	238.353	293420	4328	28.9	46.07				moraine-type，tongue-shaped
ZDSRG-315	30.2726	101.79	4345	1501.86	332.804	499825	4037	36.1	226.86				moraine-type，tongue-shaped
ZDSRG-316	30.2763	101.787	4364	1458.43	502.333	732618	4114	25.8	238.42				moraine-type，tongue-shaped
ZDSRG-317	30.2835	101.774	4462	742.17	212.878	157992	4264	47.4	210.22				moraine-type，tongue-shaped
ZDSRG-318	30.2873	101.768	4387	1492.44	348.335	519869	4129	29.9	257.65				moraine-type，tongue-shaped
ZDSRG-319	30.2926	101.764	4407	1277	510.331	651693	4111	27.3	235.64				moraine-type，tongue-shaped
ZDSRG-320	30.2973	101.754	4428	1004.74	591.155	593957	4018	41.7	213.03				moraine-type，tongue-shaped
ZDSRG-321	30.2987	101.746	4253	1225.66	326.213	399826	3988	40.1	185.15				moraine-type，tongue-shaped
ZDSRG-322	30.3033	101.741	4434	587.64	244.12	143455	4356	44.9	209.01				moraine-type，tongue-shaped
ZDSRG-323	30.3061	101.731	4460	1029.28	431.487	444121	4250	28.3	245.03				moraine-type，tongue-shaped
ZDSRG-324	30.3118	101.721	4432	612.74	1580.23	968273	4267	38.4	217.41				moraine-type，lobate-shaped
ZDSRG-325	30.2774	101.805	4186	1905.19	537.231	1.02353e+06	3850	35.5	78.23				moraine-type，tongue-shaped
ZDSRG-326	30.2844	101.803	4198	2160.91	832.845	1.7997e+06	3855	28.8	74.34				moraine-type，tongue-shaped
ZDSRG-327	30.2971	101.808	4066	1537.65	622.579	957309	3747	35.1	51.13				moraine-type，tongue-shaped
ZDSRG-328	30.2967	101.798	4273	2240.85	428.49	960182	3832	26.1	25.91				moraine-type，tongue-shaped
ZDSRG-329	30.2946	101.79	4334	1828.04	336.221	614626	4037	35.7	23.45				moraine-type，tongue-shaped
ZDSRG-330	30.2858	101.789	4569	429.03	486.395	208678	4468	31.7	358.88				moraine-type，lobate-shaped
ZDSRG-331	30.2912	101.783	4457	947.12	167.451	158597	4387	21	359.9				moraine-type，tongue-shaped
ZDSRG-332	30.2863	101.78	4580	1051.17	299.187	314496	4505	18.4	305.38				moraine-type，tongue-shaped
ZDSRG-333	30.2934	101.777	4433	924.35	305.269	282175	4350	24	19.53				moraine-type，tongue-shaped
ZDSRG-334	30.2921	101.774	4574	652.92	259.162	169212	4509	26.8	341.54				moraine-type，tongue-shaped
ZDSRG-335	30.3161	101.788	4263	2498.26	338.992	846890	3862	28.7	12.84				moraine-type，tongue-shaped
ZDSRG-336	30.3133	101.783	4387	759.34	384.534	291992	4138	41	16.83				moraine-type，tongue-shaped
ZDSRG-337	30.3191	101.781	4293	669.44	195.544	130905	4087	37.3	76.56				moraine-type，tongue-shaped
ZDSRG-338	30.3265	101.779	4174	603.58	153.163	92446.1	4064	60.2	329.44				moraine-type，tongue-shaped
ZDSRG-339	30.3226	101.775	4194	922.11	444.9	410246	4068	46	344.78				moraine-type，tongue-shaped
ZDSRG-340	30.3111	101.765	4295	234.05	1238.78	289936	4199	24.8	250.68	1844.01	324	4619	talus-type，lobate-shaped
ZDSRG-341	30.3029	101.76	4511	569.2	1492.62	849601	4340	22.8	0.8				moraine-type，lobate-shaped
ZDSRG-342	30.3075	101.743	4504	554.36	1120.13	620953	4395	34.1	7.83				moraine-type，lobate-shaped
ZDSRG-343	30.3112	101.741	4334	350.13	215.09	75309.5	4309	40.3	19.14				moraine-type，tongue-shaped
ZDSRG-344	30.3147	101.739	4408	491.75	244.924	120441	4306	38.9	77.48				moraine-type，tongue-shaped
ZDSRG-345	30.3167	101.737	4413	649.97	220.121	143072	4317	25.6	29.1				moraine-type，tongue-shaped
ZDSRG-346	30.3128	101.729	4519	556.45	639.787	356009	4436	30.9	355.35				moraine-type，lobate-shaped
ZDSRG-347	30.325	101.717	4471	1574.48	734.76	1.15687e+06	4074	42	53.38				moraine-type，tongue-shaped
ZDSRG-348	30.3312	101.71	4565	2313.89	613.863	1.42041e+06	4085	32	65.68				moraine-type，tongue-shaped
ZDSRG-349	30.3407	101.707	4675	1499.83	827.709	1.24142e+06	4193	36.8	60.98				moraine-type，tongue-shaped
ZDSRG-350	30.3483	101.703	4714	1362.18	688.67	938092	4439	41.1	87.39				moraine-type，tongue-shaped
ZDSRG-351	30.3556	101.695	4827	1231.23	457.986	563887	4599	34.2	355.4				moraine-type，tongue-shaped
ZDSRG-352	30.3629	101.689	4677	892.38	476.097	424860	4511	33.3	10.47				moraine-type，tongue-shaped
ZDSRG-354	30.3664	101.696	4820	1179.48	703.802	830120	4480	41.2	247.84				moraine-type，tongue-shaped
ZDSRG-355	30.3617	101.702	4899	1261.3	685.068	864076	4610	38.2	212.75				moraine-type，tongue-shaped
ZDSRG-356	30.3534	101.709	4535	470.19	1397.32	657005	4367	44.3	182.63	1139.29	548	5083	talus-type，lobate-shaped
ZDSRG-357	30.3467	101.719	4433	1407.68	563.639	793424	4242	38.6	245.65				moraine-type，tongue-shaped
ZDSRG-358	30.3443	101.727	4557	1045.23	410.25	428806	4378	34.4	183.97				moraine-type，tongue-shaped
ZDSRG-359	30.3467	101.735	4748	1667.86	783.994	1.30759e+06	4288	36.8	189.36				moraine-type，tongue-shaped
ZDSRG-360	30.3415	101.745	4651	997.92	658.716	657346	4411	40.8	197.46				moraine-type，tongue-shaped
ZDSRG-361	30.3501	101.75	4414	1615.98	953.73	1.54121e+06	4093	44.5	61.8				moraine-type，tongue-shaped
ZDSRG-362	30.3577	101.745	4710	2370.06	569.473	1.34969e+06	4206	31.1	73.63				moraine-type，tongue-shaped
ZDSRG-363	30.371	101.745	4556	2251.43	1548.95	3.48736e+06	4020	41.9	35.08				moraine-type，tongue-shaped
ZDSRG-364	30.355	101.725	4810	1105.55	564.038	623572	4562	42.6	268.61				moraine-type，tongue-shaped
ZDSRG-365	30.3602	101.728	4725	1547.18	499.408	772673	4483	34.2	316.87				moraine-type，tongue-shaped
ZDSRG-366	30.3641	101.73	4708	1106.83	275.448	304874	4483	43.6	303.6				moraine-type，tongue-shaped
ZDSRG-367	30.3684	101.73	4639	996.43	321.278	320131	4438	35.8	284.94				moraine-type，tongue-shaped
ZDSRG-368	30.3731	101.731	4531	836.09	415.751	347605	4417	50.5	294.37				moraine-type，tongue-shaped
ZDSRG-369	30.3801	101.732	4471	858.76	584.971	502350	4299	38.9	310.84				moraine-type，tongue-shaped
ZDSRG-370	30.3602	101.715	4799	948.13	557.354	528444	4551	48.6	95.76				moraine-type，tongue-shaped
ZDSRG-371	30.3665	101.715	4780	1357.35	622.723	845253	4485	54.2	97.42				moraine-type，tongue-shaped
ZDSRG-372	30.3715	101.714	4800	2180.67	495.597	1.08073e+06	4413	30.4	87.25				moraine-type，tongue-shaped
ZDSRG-373	30.3878	101.719	4651	1127.42	2244.71	2.53073e+06	4340	37.9	90.62	3255.51	1127	5778	talus-type，lobate-shaped
ZDSRG-374	30.4288	101.662	4362	536.39	144.557	77539.1	4315	47	48.67				moraine-type，tongue-shaped
ZDSRG-375	30.4312	101.657	4421	1209.24	284.309	343798	4280	26.8	54.22				moraine-type，tongue-shaped
ZDSRG-376	30.4363	101.656	4320	1686.95	274.201	462564	4050	32.7	47.99				moraine-type，tongue-shaped
ZDSRG-377	30.4358	101.646	4384	1900.59	403.005	765947	4080	31.6	352.08				moraine-type，tongue-shaped
ZDSRG-378	30.4323	101.641	4384	2206.94	227.01	500998	4138	20.3	347.59				moraine-type，tongue-shaped
ZDSRG-379	30.4202	101.641	4577	673.04	315.354	212246	4500	23.8	346.27				moraine-type，tongue-shaped
ZDSRG-380	30.421	101.636	4523	633.11	352.552	223204	4426	35.6	352.23				moraine-type，tongue-shaped
ZDSRG-381	30.4252	101.657	4412	523.12	105.196	55030.1	4354	60.3	138.82				moraine-type，tongue-shaped
ZDSRG-382	30.4254	101.65	4576	914.31	202.204	184877	4449	24.8	168.4				moraine-type，tongue-shaped
ZDSRG-383	30.4252	101.647	4639	290.66	170.649	49601	4567	52.4	165.97				moraine-type，tongue-shaped
ZDSRG-384	30.4203	101.648	4423	800.62	370.532	296656	4351	38.7	103.88				moraine-type，tongue-shaped
ZDSRG-385	30.4115	101.635	4519	1229.14	147.95	181851	4368	23.3	136.36				moraine-type，tongue-shaped
ZDSRG-386	30.4161	101.627	4553	488.89	907.182	443512	4475	41.2	4.21				moraine-type，lobate-shaped
ZDSRG-387	30.3891	101.64	4320	423.66	945.763	400682	4222	44.5	59.23	1152.1	281	4601	talus-type，lobate-shaped
ZDSRG-388	30.3901	101.636	4467	1198.73	199.145	238722	4375	17.2	30.4				moraine-type，tongue-shaped
ZDSRG-389	30.4189	101.613	4495	823.89	196.826	162163	4418	24.9	293.21				moraine-type，tongue-shaped
ZDSRG-390	30.4596	101.643	4370	1283.43	229.833	294975	4216	24.4	11.46				moraine-type，tongue-shaped
ZDSRG-391	30.4601	101.637	4330	1639.91	294.841	483513	4101	27.6	17.23				moraine-type，tongue-shaped
ZDSRG-392	30.4576	101.629	4370	1523.23	196.546	299384	4205	29.3	339.97				moraine-type，tongue-shaped
ZDSRG-393	30.4608	101.631	4359	1034.33	172.584	178508	4231	30	341.92				moraine-type，tongue-shaped
ZDSRG-394	30.4472	101.629	4565	268.75	196.229	52736.6	4535	33	302.23				moraine-type，tongue-shaped
ZDSRG-395	30.4542	101.624	4393	1483.64	245.688	364512	4090	29.1	311.6				moraine-type，tongue-shaped
ZDSRG-396	30.4489	101.636	4451	1218.67	324.699	395701	4258	23.6	89.42				moraine-type，tongue-shaped
ZDSRG-397	30.452	101.638	4507	544.99	165.978	90456.4	4478	23.5	116.03				moraine-type，tongue-shaped
ZDSRG-398	30.4435	101.632	4462	1056.45	247.066	261013	4264	29.9	99.02				moraine-type，tongue-shaped
ZDSRG-399	30.4399	101.631	4461	866.44	204.411	177109	4342	37.5	90.87				moraine-type，tongue-shaped
ZDSRG-400	30.4372	101.628	4487	951.41	166.077	158008	4386	23.6	92.05				moraine-type，tongue-shaped
ZDSRG-401	30.4478	101.622	4492	1339.64	187.425	251082	4288	23	314.44				moraine-type，tongue-shaped
ZDSRG-404	30.4227	101.618	4558	302.13	920.392	278078	4518	35.5	92.01				moraine-type，lobate-shaped
ZDSRG-405	30.4305	101.625	4545	1064.26	148.943	158514	4417	22.9	84.33				moraine-type，tongue-shaped
ZDSRG-406	30.4455	101.598	4496	196.08	265.154	51991.4	4476	45.8	236.67	450.39	96	4592	talus-type，lobate-shaped
ZDSRG-407	30.4484	101.601	4543	135.13	511.109	69066.1	4528	54	348.91				moraine-type，lobate-shaped
ZDSRG-408	30.4501	101.608	4451	683.91	178.479	122064	4368	22.3	53.05				moraine-type，tongue-shaped
ZDSRG-409	30.4648	101.611	4425	1130.44	378.369	427724	4250	31.8	63.83				moraine-type，tongue-shaped
ZDSRG-410	30.4845	101.624	4345	973.73	257.881	251106	4256	26.1	11.66				moraine-type，tongue-shaped
ZDSRG-411	30.4838	101.62	4377	1206.34	170.439	205607	4244	22.5	7.47				moraine-type，tongue-shaped
ZDSRG-412	30.4808	101.615	4403	1150.39	357.547	411319	4259	26.4	1.98				moraine-type，tongue-shaped
ZDSRG-413	30.4735	101.61	4446	1114.82	277.829	309729	4336	21.4	351.86				moraine-type，tongue-shaped
ZDSRG-414	30.4831	101.597	4411	1216.39	332.868	404897	4246	21.1	63.29				moraine-type，tongue-shaped
ZDSRG-415	30.5077	101.616	4177	642.49	204.91	131653	4014	55.6	32.16				moraine-type，tongue-shaped
ZDSRG-416	30.5059	101.611	4234	1620.38	217.143	351854	3979	28.8	21.55				moraine-type，tongue-shaped
ZDSRG-417	30.5042	101.606	4350	1094.24	115.455	126336	4245	20.1	25.19				moraine-type，tongue-shaped
ZDSRG-418	30.5125	101.608	4209	745.17	162.788	121305	3986	50.9	37.11				moraine-type，tongue-shaped
ZDSRG-419	30.508	101.602	4299	296.41	799.566	236999	4025	14.6	237.87	1461.64	159	4458	talus-type，lobate-shaped
ZDSRG-420	30.5057	101.593	4378	1297.7	181.938	236100	4184	21.8	35.04				moraine-type，tongue-shaped
ZDSRG-421	30.5067	101.591	4337	1210	219.316	265372	4206	20.8	28.83				moraine-type，tongue-shaped
ZDSRG-422	30.5195	101.587	4389	1074.28	536.261	576095	4126	43.6	27.81				moraine-type，tongue-shaped
ZDSRG-423	30.5234	101.583	4196	992.94	264.185	262320	4068	33.8	51.11				moraine-type，tongue-shaped
ZDSRG-425	30.0367	101.906	4258	587.86	170.789	100400	4213	34.8	46.89				moraine-type，tongue-shaped
ZDSRG-426	30.044	101.887	4512	560.75	212.996	119437	4448	18.7	93.09				moraine-type，tongue-shaped
ZDSRG-427	30.0283	101.912	4200	169.53	199.496	33820.5	4184	46.5	349.97				moraine-type，lobate-shaped
ZDSRG-428	30.0294	101.917	4128	634.78	145.957	92650.8	4087	19.4	69.96				moraine-type，tongue-shaped
ZDSRG-429	30.0659	101.877	4540	389.06	220.792	85901.5	4535	22.2	213.16				moraine-type，tongue-shaped
ZDSRG-430	30.0799	101.872	4516	184.56	328.578	60642.4	4494	41.9	307.45				moraine-type，lobate-shaped
ZDSRG-431	30.0741	101.868	4608	178.35	285.359	50893.7	4597	47	353.42				moraine-type，lobate-shaped
ZDSRG-432	30.0839	101.862	4465	233.77	116.487	27231.1	4441	45.6	49.75				moraine-type，tongue-shaped
ZDSRG-433	30.0932	101.86	4462	244.79	296.492	72578.2	4441	29.6	323.17				moraine-type，lobate-shaped
ZDSRG-434	30.0906	101.858	4506	205.1	149.271	30615.4	4494	32	307.09				moraine-type，tongue-shaped
ZDSRG-435	30.0909	101.86	4493	185.5	129.123	23952.2	4463	40.1	91.56				moraine-type，tongue-shaped
ZDSRG-436	30.1054	101.836	4524	500.93	287.861	144198	4428	35.8	117.51				moraine-type，tongue-shaped
ZDSRG-437	30.1072	101.841	4445	297.51	473.324	140819	4395	41.7	151.94				moraine-type，lobate-shaped
ZDSRG-438	30.1214	101.833	4443	473.59	104.674	49572.5	4367	26.5	32.24				moraine-type，tongue-shaped
ZDSRG-439	30.1146	101.837	4389	175.28	205.398	36002.2	4381	55.1	338.69				moraine-type，lobate-shaped
ZDSRG-440	30.1094	101.832	4485	172.59	185.605	32033.5	4472	45.7	353.52				moraine-type，lobate-shaped
ZDSRG-441	30.1778	101.759	4366	410.7	666.358	273673	4315	44.9	335.91				moraine-type，lobate-shaped
ZDSRG-442	30.1601	101.759	4685	365.89	204.665	74885	4629	40.7	262.05				moraine-type，tongue-shaped
ZDSRG-443	30.1622	101.76	4694	274.86	129.386	35563	4673	40.9	277.48				moraine-type，tongue-shaped
ZDSRG-444	30.1557	101.761	4644	729.49	383.129	279489	4536	34.7	240.94				moraine-type，tongue-shaped
ZDSRG-445	30.1369	101.775	4747	278.53	147.822	41172.9	4712	40.2	233.77				moraine-type，tongue-shaped
ZDSRG-446	30.1352	101.775	4719	386.38	112.726	43555.1	4685	47.3	237.92				moraine-type，tongue-shaped
ZDSRG-447	30.1329	101.776	4662	436.56	183.918	80291.2	4638	53.3	218.12				moraine-type，tongue-shaped
ZDSRG-448	30.1298	101.776	4654	683.74	154.025	105313	4554	35.9	226.06				moraine-type，tongue-shaped
ZDSRG-449	30.0929	101.807	4518	281.73	307.601	86660.4	4480	43.7	226.97	263	235	4753	talus-type，lobate-shaped
ZDSRG-450	30.1022	101.82	4746	387.47	427.525	165653	4663	37.9	156.09				moraine-type，lobate-shaped
ZDSRG-451	30.0594	101.83	4189	572.87	163.326	93564.4	4138	28.6	225.4				moraine-type，tongue-shaped
ZDSRG-452	30.0527	101.833	4268	276.81	85.2763	23605.3	4228	36.8	240.87				moraine-type，tongue-shaped
ZDSRG-453	30.0617	101.843	4375	215.47	353.891	76252.8	4312	38.5	179.15	521	195	4570	talus-type，lobate-shaped
ZDSRG-454	30.0183	101.903	4119	478.2	103.813	49643.2	4073	35.9	173.43				moraine-type，tongue-shaped
ZDSRG-455	30.1873	101.826	4559	425.46	207.706	88370.5	4506	28	159.72				moraine-type，tongue-shaped
ZDSRG-133	30.1881	101.811	4517	841.11	150.835	126869	4442	21.8	206.07				moraine-type，tongue-shaped
ZDSRG-456	30.1929	101.807	4498	188.61	713.672	134606	4492	45.6	216.56				moraine-type，lobate-shaped
ZDSRG-457	30.1902	101.809	4502	183.89	139.409	25636	4479	37.3	254.3				moraine-type，tongue-shaped
ZDSRG-149	30.2235	101.776	4383	1143.68	367.817	420665	4276	21.3	280.92				moraine-type，tongue-shaped
ZDSRG-458	30.2279	101.778	4430	183.89	610.868	112332	4333	45.2	238.57				moraine-type，lobate-shaped
ZDSRG-459	30.2008	101.797	4639	172.28	454.683	78332.8	4589	48.1	42.77				moraine-type，lobate-shaped
ZDSRG-460	30.2008	101.801	4520	303.3	236.093	71607	4498	41	80.75				moraine-type，tongue-shaped
ZDSRG-461	30.1957	101.806	4544	189.4	262.034	49629.2	4535	40.6	17.77				moraine-type，lobate-shaped
ZDSRG-462	30.1928	101.82	4569	347.58	105.246	36581.4	4557	20.8	293.41				moraine-type，tongue-shaped
ZDSRG-463	30.3158	101.796	4206	793.75	885.785	703092	3991	47.9	38.27				moraine-type，lobate-shaped
ZDSRG-200	30.2439	101.836	4394	920.48	464.319	427396	4168	30.2	27.41				moraine-type，tongue-shaped
ZDSRG-464	30.2436	101.84	4366	410.68	165.478	67958.3	4270	45.3	10.38				moraine-type，tongue-shaped
ZDSRG-465	30.2485	101.833	4256	732.24	397.69	291205	4072	45.2	28.26				moraine-type，tongue-shaped
ZDSRG-466	30.248	101.85	4271	1079.75	503.73	543903	3965	32.8	38.87				moraine-type，tongue-shaped
ZDSRG-467	30.2574	101.847	4054	1097.23	283.183	310717	3831	51.4	32.26				moraine-type，tongue-shaped
ZDSRG-242	30.2506	101.74	4587	319.09	321.175	102484	4544	28.2	281.1				moraine-type，lobate-shaped
ZDSRG-468	30.2486	101.738	4552	581.8	130.541	75948.5	4492	23.3	288.86				moraine-type，tongue-shaped
ZDSRG-243	30.2475	101.737	4518	485.52	135.885	65974.9	4461	21.7	292.26				moraine-type，tongue-shaped
ZDSRG-469	30.2455	101.741	4548	534.82	190.178	101711	4500	23.7	233.08				moraine-type，tongue-shaped
ZDSRG-224	30.2425	101.745	4533	489.37	356.453	174437	4498	38.1	232.32				moraine-type，tongue-shaped
ZDSRG-470	30.2384	101.746	4483	268.4	457.903	122901	4469	38.2	262.92				moraine-type，lobate-shaped
ZDSRG-221	30.2373	101.757	4359	498.56	282.55	140868	4319	26.9	21.89				moraine-type，tongue-shaped
ZDSRG-471	30.2372	101.761	4339	532.09	157.805	83966.6	4267	33.8	63.37				moraine-type，tongue-shaped
ZDSRG-472	30.2384	101.751	4464	320.43	565.181	181101	4382	42.9	73.45				moraine-type，lobate-shaped
ZDSRG-222	30.2432	101.754	4506	881.27	229.309	202083	4348	29.5	123.42				moraine-type，tongue-shaped
ZDSRG-473	30.2417	101.751	4514	702.28	267.422	187805	4406	28	117.21				moraine-type，tongue-shaped
ZDSRG-229	30.2516	101.746	4570	552.65	742.439	410309	4480	28.4	119.71				moraine-type，lobate-shaped
ZDSRG-474	30.255	101.755	4370	1350.62	296.1	399919	4222	27.9	105.15				moraine-type，tongue-shaped
ZDSRG-231	30.2617	101.763	4366	795.83	177.615	141351	4206	30.1	18.73				moraine-type，tongue-shaped
ZDSRG-475	30.2593	101.758	4474	137.5	417.617	57422.4	4452	61.6	6.99				moraine-type，lobate-shaped
ZDSRG-476	30.2608	101.754	4515	511.98	271.944	139230	4468	37.3	51.46				moraine-type，tongue-shaped
ZDSRG-477	30.2626	101.753	4466	397.53	127.725	50774.5	4433	41	1.81				moraine-type，tongue-shaped
ZDSRG-253	30.2866	101.716	4621	515.05	215.761	111128	4549	35.9	291.87				moraine-type，tongue-shaped
ZDSRG-255	30.2852	101.714	4607	295.13	191.482	56512.2	4555	32.7	315.32				moraine-type，tongue-shaped
ZDSRG-478	30.2841	101.711	4573	457.05	116.808	53387.1	4512	31	294.44				moraine-type，tongue-shaped
ZDSRG-479	30.3682	101.652	4592	465.18	266.653	124042	4548	45.5	39.08				moraine-type，tongue-shaped
ZDSRG-284	30.3817	101.658	4605	601.25	203.182	122163	4528	37.4	300.5				moraine-type，tongue-shaped
ZDSRG-480	30.3832	101.66	4630	173.32	302.752	52472.9	4604	52.7	283.85				moraine-type，tongue-shaped
ZDSRG-285	30.3915	101.659	4549	1366.6	228.862	312763	4405	20.7	276.62				moraine-type，tongue-shaped
ZDSRG-481	30.3479	101.666	4810	387.52	122.86	47610.7	4799	38.9	333.15				moraine-type，tongue-shaped
ZDSRG-300	30.3347	101.675	4753	492.51	302.014	148745	4662	37.7	79.26				moraine-type，tongue-shaped
ZDSRG-482	30.3375	101.676	4730	337.55	164.056	55377.1	4683	66.5	92.24				moraine-type，tongue-shaped
ZDSRG-403	30.4237	101.612	4540	561.23	121.685	68293.2	4479	24.2	271.12				moraine-type，tongue-shaped
ZDSRG-483	30.4321	101.621	4548	1099.82	65.2653	71780.1	4417	22.9	81.81				moraine-type，tongue-shaped
ZDSRG-484	30.4306	101.614	4494	194.43	366.761	71309.3	4470	45.6	231.33				moraine-type，lobate-shaped
ZDSRG-402	30.4411	101.623	4552	644.73	314.585	202823	4442	29.3	296.18				moraine-type，tongue-shaped
ZDSRG-485	30.4373	101.621	4564	248.15	180.473	44784.5	4500	20.8	255.62				moraine-type，tongue-shaped
ZDSRG-486	30.4473	101.618	4401	999.36	110.707	110636	4265	26.2	308.64				moraine-type，tongue-shaped
ZDSRG-487	30.4744	101.605	4391	440.15	246.932	108687	4282	41.9	329.78				moraine-type，tongue-shaped
ZDSRG-488	30.4716	101.604	4441	412.13	76.4181	31494.2	4384	33.9	296.66				moraine-type，tongue-shaped
ZDSRG-489	30.4688	101.606	4516	408.82	204.649	83664.5	4478	34.5	274.77				moraine-type，tongue-shaped
ZDSRG-490	30.4702	101.603	4407	293.3	138.737	40691.6	4368	41.5	254.98				moraine-type，tongue-shaped
ZDSRG-491	30.4634	101.6	4481	464.18	691.818	321128	4444	29.8	347.45				moraine-type，tongue-shaped
ZDSRG-424	30.526	101.579	4162	235.15	862.367	202786	4137	37.9	337.25	938.14	250	4412	talus-type，lobate-shaped
ZDSRG-492	30.5183	101.575	4349	734.08	160.466	117795	4282	22.3	326.85				moraine-type，tongue-shaped
ZDSRG-493	30.5143	101.582	4474	333.56	389.62	129962	4432	34.3	328.28				moraine-type，tongue-shaped
ZDSRG-353	30.0421	101.85	4177	980.29	369.228	361951	3966	30.3	223.61	731.16	427	4604	talus-type，tongue-shaped
ZDSRG-494	30.5099	101.577	4451	213.78	762.074	162916	4405	36.6	325.77				moraine-type，lobate-shaped
ZDSRG-92	30.074	101.823	4434	829.99	181.523	150663	4305	19.2	294.01				moraine-type，tongue-shaped
ZDSRG-495	30.0718	101.822	4399	596.32	222.2	132502	4290	32.7	297.34				moraine-type，tongue-shaped
ZDSRG-511	30.0875	101.832	4605	624.66	259.768	162267	4518	21.7	248.9				moraine-type，tongue-shaped
ZDSRG-496	30.053	101.857	4424	583.62	195.604	114158	4351	40.6	318.29				moraine-type，tongue-shaped
ZDSRG-497	30.0531	101.862	4481	536.64	282.031	151349	4415	26.9	306.91				moraine-type，tongue-shaped
ZDSRG-498	30.0555	101.861	4458	588.73	72.7784	42846.8	4403	18.3	288.51				moraine-type，tongue-shaped
ZDSRG-499	30.0569	101.86	4422	492.7	134.963	66496.4	4385	21.2	278.27				moraine-type，tongue-shaped
ZDSRG-500	30.0598	101.857	4387	546.1	110.148	60151.7	4305	29.1	190.63				moraine-type，tongue-shaped
ZDSRG-501	30.0601	101.86	4457	535.5	99.3329	53192.8	4412	19.2	307.87				moraine-type，tongue-shaped
ZDSRG-502	30.0596	101.865	4509	396.3	278.032	110184	4473	39.8	305				moraine-type，tongue-shaped
ZDSRG-503	30.0621	101.866	4512	321.44	231.504	74414.7	4492	27	271.1				moraine-type，tongue-shaped
ZDSRG-504	30.0643	101.866	4527	282.95	118.365	33491.3	4510	25.1	284.78	227.48	73	4600	talus-type，tongue-shaped
ZDSRG-505	30.066	101.866	4562	366.09	117.359	42963.8	4533	34.2	255.43				moraine-type，tongue-shaped
ZDSRG-506	30.0689	101.869	4588	337.97	147.918	49992	4571	32.1	276.01				moraine-type，tongue-shaped
ZDSRG-507	30.0714	101.867	4563	395.5	158.915	62850.7	4528	32.6	240.3				moraine-type，tongue-shaped
ZDSRG-508	30.0674	101.865	4558	303.65	122.115	37080.2	4515	21.6	230.07				moraine-type，tongue-shaped
ZDSRG-509	30.0678	101.867	4595	337.72	113.121	38203.2	4557	31.3	301.19				moraine-type，tongue-shaped
ZDSRG-510	30.0719	101.86	4498	329.39	657.518	216580	4456	30	146.17	1222	256	4754	talus-type，lobate-shaped
ZDSRG-512	30.0555	101.91	4236	1240.3	155.63	193028	3959	38.1	113.23				moraine-type，tongue-shaped
ZDSRG-513	30.1075	101.874	4283	471.84	145.454	68630.9	4275	56.6	33.44				moraine-type，tongue-shaped
ZDSRG-514	30.1101	101.871	4219	579.4	420.385	243571	4081	51.7	331.44				moraine-type，tongue-shaped
ZDSRG-515	30.0847	101.849	4623	184.12	499.549	91977	4536	48.8	71.05				moraine-type，lobate-shaped
ZDSRG-516	30.0802	101.852	4675	184.66	623.822	115195	4638	38.3	14.93				moraine-type，lobate-shaped
ZDSRG-517	30.1489	101.771	4646	379.69	228.603	86798.2	4606	51.6	52.15				moraine-type，tongue-shaped
ZDSRG-518	30.156	101.767	4698	310.59	302.969	94099.1	4620	40.3	56.31				moraine-type，tongue-shaped
ZDSRG-519	30.1762	101.75	4501	247.56	308.263	76313.7	4460	35.9	69.6				moraine-type，lobate-shaped
ZDSRG-520	30.1784	101.747	4489	320.28	158.482	50758.5	4458	37.5	348.09				moraine-type，tongue-shaped
ZDSRG-521	30.1771	101.746	4484	193.9	1048.79	203360	4394	44.5	239.86				moraine-type，lobate-shaped
ZDSRG-522	30.1869	101.813	4394	310.73	90.912	28249.1	4387	41.2	170.7				moraine-type，tongue-shaped
ZDSRG-523	30.2199	101.778	4529	582.41	97.4798	56773.2	4278	25.6	293.66				moraine-type，tongue-shaped
ZDSRG-524	30.1965	101.832	4725	345.77	154.376	53378.6	4680	25.2	258				moraine-type，tongue-shaped
ZDSRG-525	30.1948	101.831	4677	399.48	131.53	52543.6	4653	21.4	283.12				moraine-type，tongue-shaped
ZDSRG-526	30.2119	101.813	4336	368.96	254.193	93787.1	4291	41.8	252.25				moraine-type，tongue-shaped
ZDSRG-527	30.2267	101.756	4339	452.63	132.307	59886.3	4272	37.9	71.71				moraine-type，tongue-shaped
ZDSRG-528	30.2263	101.753	4410	245.45	61.572	15112.9	4389	25	358.33				moraine-type，tongue-shaped
ZDSRG-529	30.2262	101.752	4404	161.54	37.9519	6130.75	4399	43.7	5.04				moraine-type，tongue-shaped
ZDSRG-530	30.2259	101.752	4413	108.79	36.9203	4016.55	4410	18.5	347.15				moraine-type，tongue-shaped
ZDSRG-531	30.2279	101.752	4377	87.8	39.8957	3502.84	4372	23.15	35.75				moraine-type，tongue-shaped
ZDSRG-532	30.3034	101.7	4768	2895.79	385.267	1.11565e+06	4340	28.8	191.04				moraine-type，tongue-shaped
ZDSRG-533	30.52	101.577	4340	967.11	97.635	94423.7	4114	24.5	302.09				moraine-type，tongue-shaped
ZDSRG-534	30.0846	101.806	4447	347.57	218.044	75785.6	4389	31.7	269.13				moraine-type，tongue-shaped
